# Supplementary material
Source: PubMed Central journal article supplement (PMC2757088)
Supplement: NIHMS119232-supplement-01.pdf [file NIHMS119232-supplement-01.pdf]

## Supplemental Data

### ***TFIIH kinase places bivalent marks on the carboxyl-terminal domain of RNA polymerase II***

M. Sohail Akhtar<sup>1,4</sup>, Martin Heidemann<sup>2,4</sup>, Joshua Tietjen<sup>1</sup>, David Zhang<sup>1</sup>, Rob D. Chapman<sup>2</sup>, Dirk Eick<sup>2,\*</sup>, Aseem Z. Ansari<sup>1,3,\*</sup>

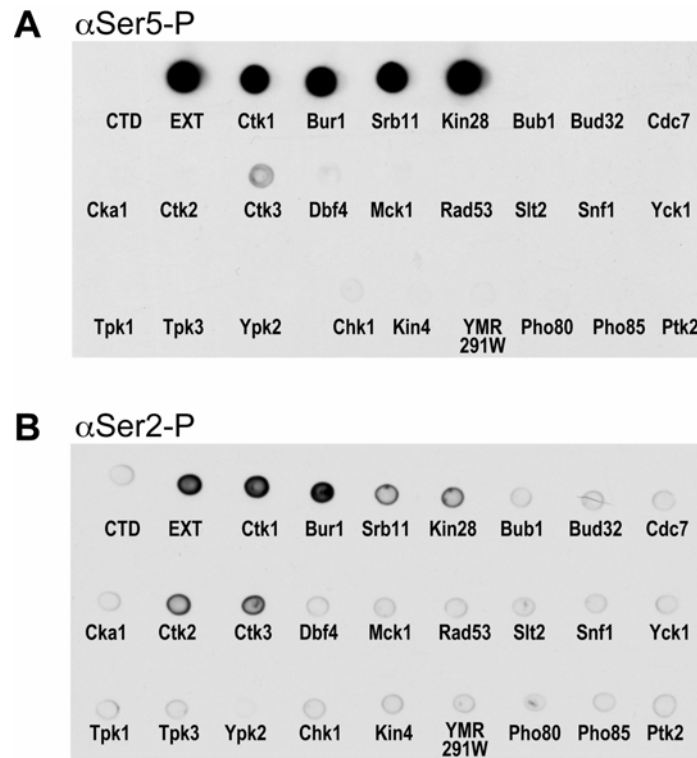

**Figure S1- Tandem affinity purified kinases phosphorylate the known substrates**

**(A)** Dot blot assay of GST-CTD phosphorylated by purified yeast kinases and probed with  $\alpha$ Ser5-P antibody. Names of the kinases are mentioned below their respective spot on the blot. CTD unphosphorylated (-) and phosphorylated by yeast cell extract (EXT) are used as negative and positive controls respectively.

**(B)** Dot blot assay of GST-CTD phosphorylated by purified yeast kinases and probed with  $\alpha$ Ser2-P antibody.

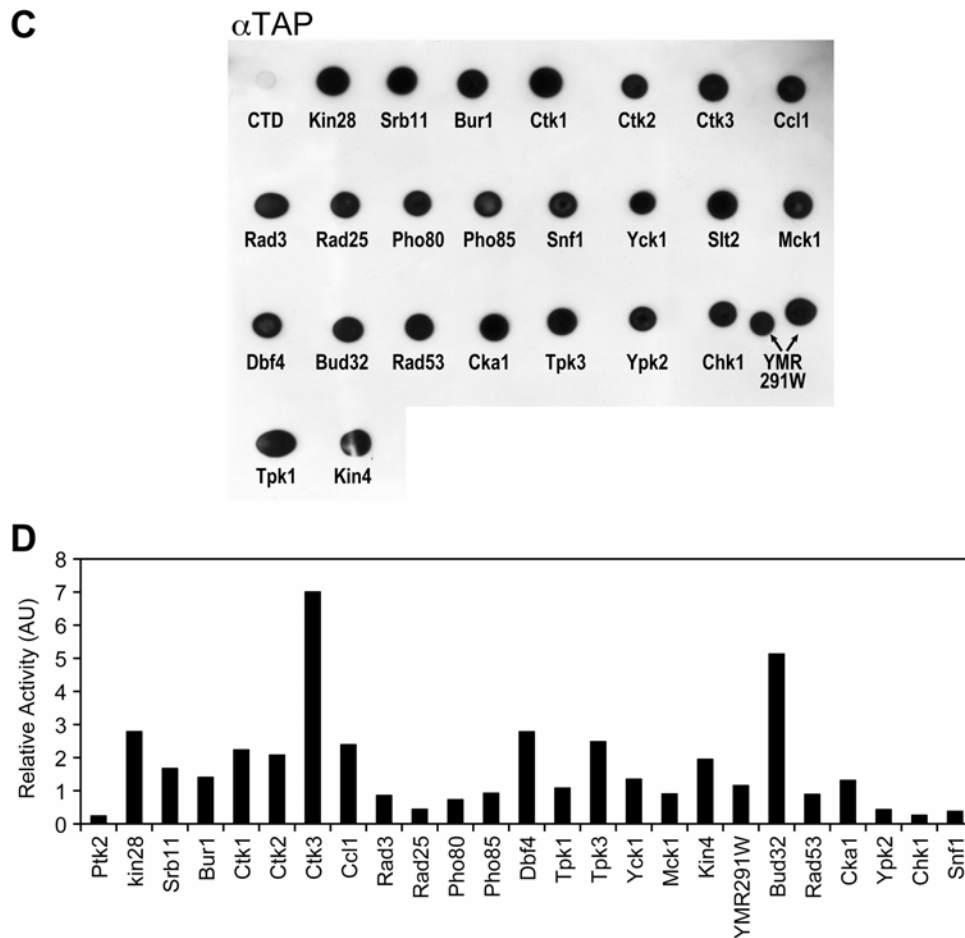

**(C)** Dot blot of purified nuclear kinases and cyclins with  $\alpha$ TAP antibody (Open biosystems). Kinases and cyclins are mentioned below their respective spot on the blot.

**(D)** Activity of purified yeast kinases against a common substrate, Ptk2. The reaction mix was resolved by SDS PAGE and the relative phosphorylation was quantitated using phosphoimager. Name of the kinases are mentioned below their respective bar.

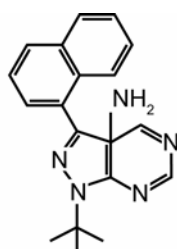

**1-NA-PP1**

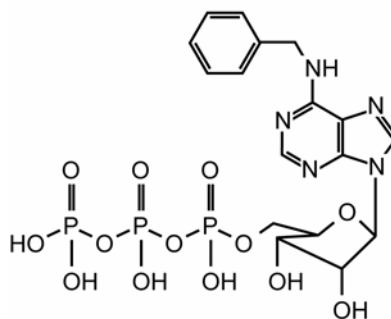

**N<sup>6</sup>-benzyl ATP**

**Figure S2- Chemical structure of 1-NA-PP1 and N<sup>6</sup>- benzyl ATP**

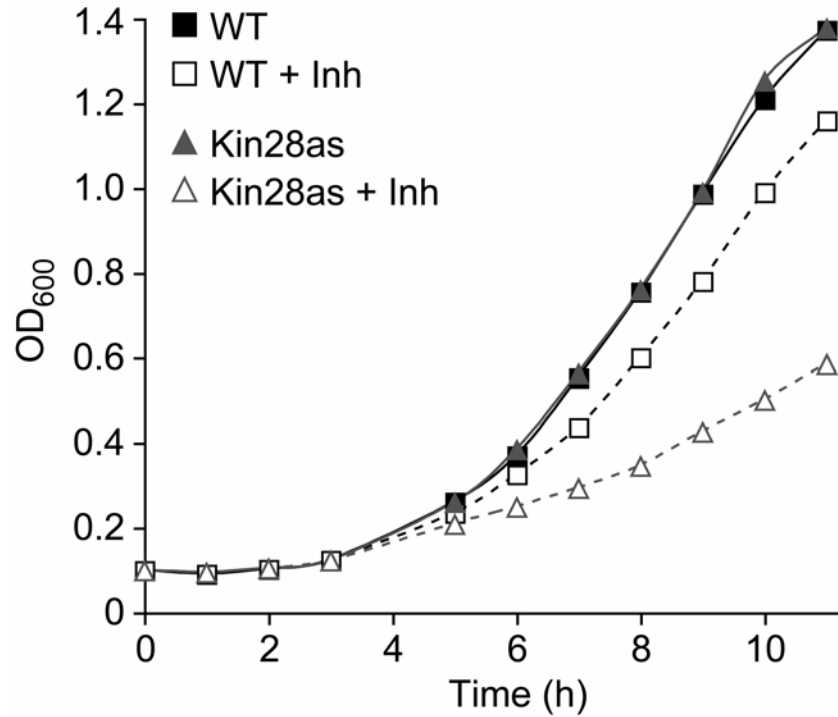

**Figure S3- Growth curve for wild type and mutant strains**

Growth curve for the wild type (Kin28) and its analog sensitive single mutant Kin28as (Kin28-L83G) in presence and absence of inhibitors. Inhibitors (2 $\mu$ M 1-NA-PP1 and 4 $\mu$ M 1-NM-PP1) were added at OD<sub>600</sub> of 0.5 for 30 minutes.

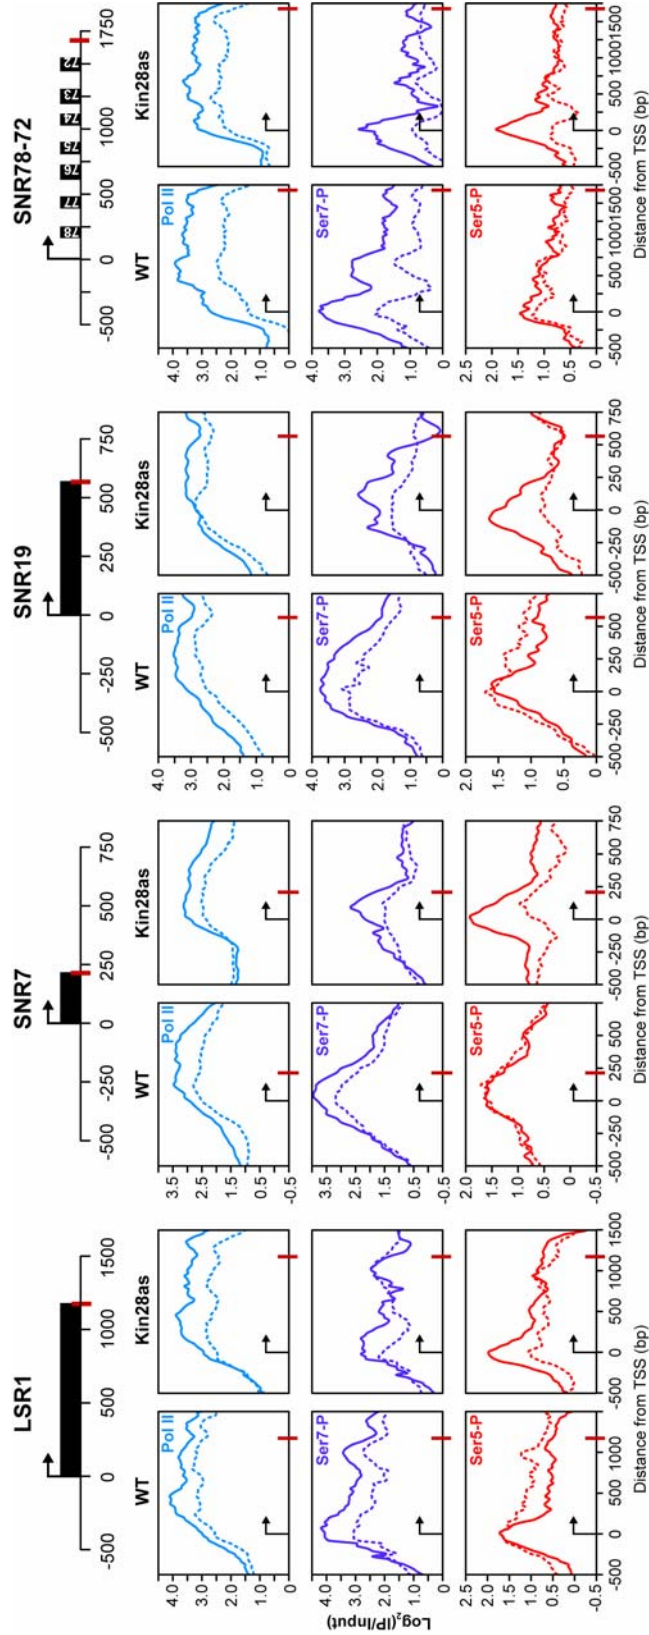

**Figure S4- ChIP chip profile for different representative snRNAs**

Inhibition effect on Pol II (blue),  $\alpha$ Ser7-P (green) and  $\alpha$ Ser5-P (red) occupancy profile shown for LSR1, SNR7, SNR19, and SNR72-78. Uninhibited profiles are shown as solid lines and inhibited profiles as dashed lines. TSS and 3' processing sites are marked by an arrow and a red bar. All x-axes are shown as the distance in base pairs relative to the TSS and y-axes are shown on a log<sub>2</sub> scale for ChIP chip enrichment (IP/input).

## EXPERIMENTAL PROCEDURES

### *In vitro* kinase assay

The substrate (200ng) used for this assay were either GST-CTD3 (three repeats of YSPTSPS attached to GST) or GST-CTD16 (sixteen repeats of YSPTSPS attached to GST) or GST-CTD4 (four repeats of YSPTSPS attached to GST) or Ser2A (serine 2 is replaced with alanine in all four repeat) or Ser5A (serine 5 is replaced with alanine in all four repeat) or Ser7A (serine 7 is replaced with alanine in all four repeat) and were purified as described previously (Ansari et al., 2005; Patturajan et al., 1998). The assays were conducted in a 25 $\mu$ l reaction volume at 25°C for two hours in buffer containing 20mM HEPES [pH 7.5], 2.5mM EGTA, 15mM magnesium acetate, 0.8mM ATP, 10% glycerol, protease inhibitors and phosphatase inhibitors [1mM NaN<sub>3</sub>, 1mM NaF, 0.4mM Na<sub>3</sub>VO<sub>3</sub>]. Four micro-liters from the reaction mix were directly spotted onto nitrocellulose membrane (Amersham Biosciences) and further processed as a standard dot blotting protocol.

For ELISA, The CTD-peptide (YSPTSPSYSPTSPSYSPTSPSYSPTSPSC; Peptide Specialty Laboratories GmbH, Heidelberg) was coupled on 96-well maleimide plates for 60 minutes at 37°C in carbonate buffer at pH 9.5. After washing, the kinase assay was performed using recombinant kinase (100ng) in 25 $\mu$ l kinase buffer containing 20mM TrisCl [pH 7.4], 20mM NaCl, 10mM MgCl<sub>2</sub>, 1 $\mu$ M DTT and 2 $\mu$ M ATP, at 28°C for 60 minutes followed by washing and blocking with PBS/milk (1%) for 30 minutes. Primary antibodies were added and incubated for 30 minutes. After an additional

washing and blocking step, biotin-coupled secondary antibodies were added for 30 minutes. Following another washing and blocking step, peroxidase attached to avidin was added to the wells. After washing five times with PBS, 50  $\mu$ l of substrate buffer (containing o-phenylenediamine and  $H_2O_2$ ; pH 5) were added and after the color change, samples OD were measured at 405nm in the ELISA reader.

### **ChIP-chip analysis**

For microarray analysis, the whole genome “input” samples were labeled with Cy3-dUTP and the “IP” samples were labeled with Cy5-dUTP. The reaction products were purified using the QIAquick PCR Purification Kit and the concentrations verified via nano-drop (Thermo Scientific).
